# Supplementary material for: Fabrication and Characterization of Poly(lactic acid)-Based Biopolymer for Surgical Sutures
Source: MDPI journal article supplement (doi:10.3390/chemengineering7050098), 2023-10-13
Supplement: s1 [file s1]

## Fabrication and Characterization of Poly (lactic acid)-Based Biopolymer for Surgical Sutures

### (Supplementary Material)

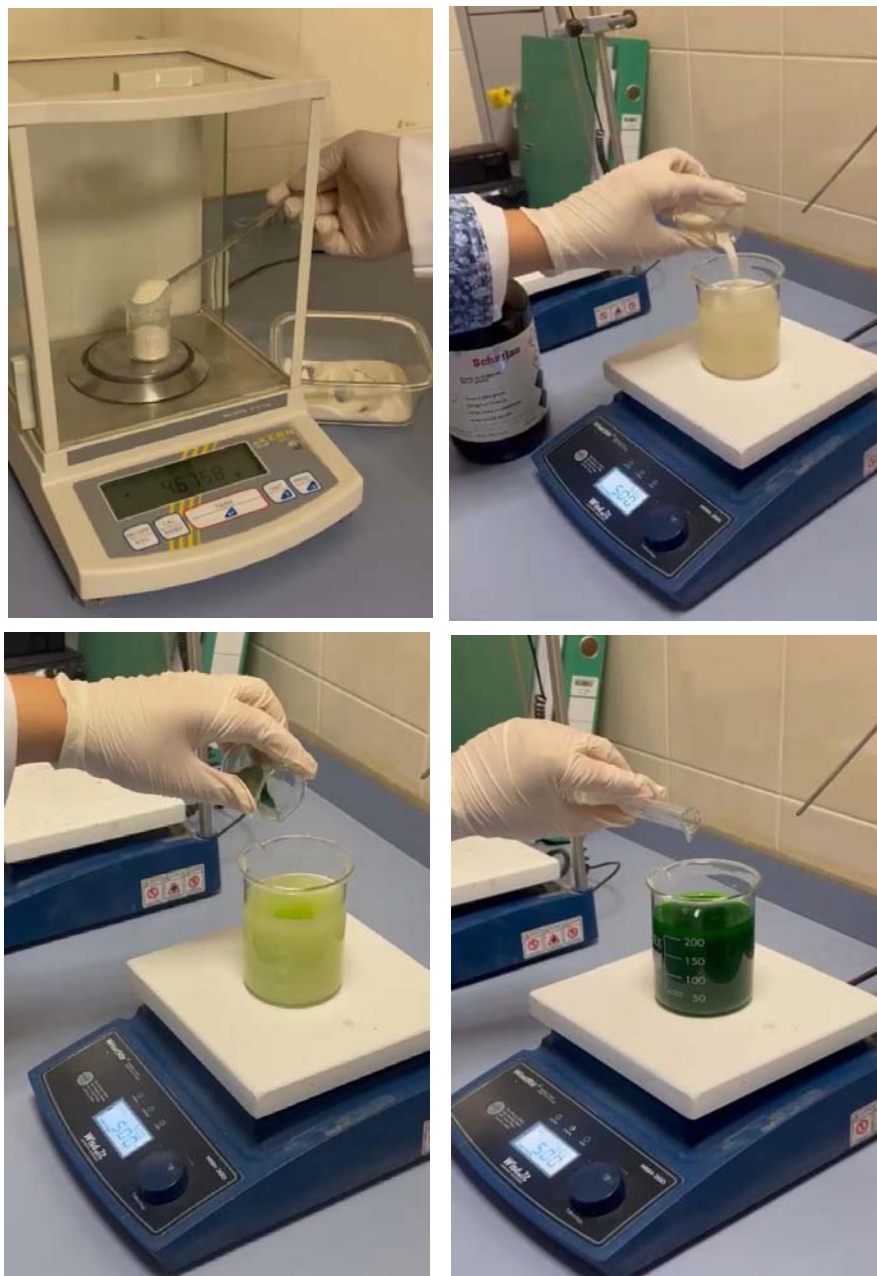

**Figure S1: Preparing the Chitosan Coating Solution in the Lab.**

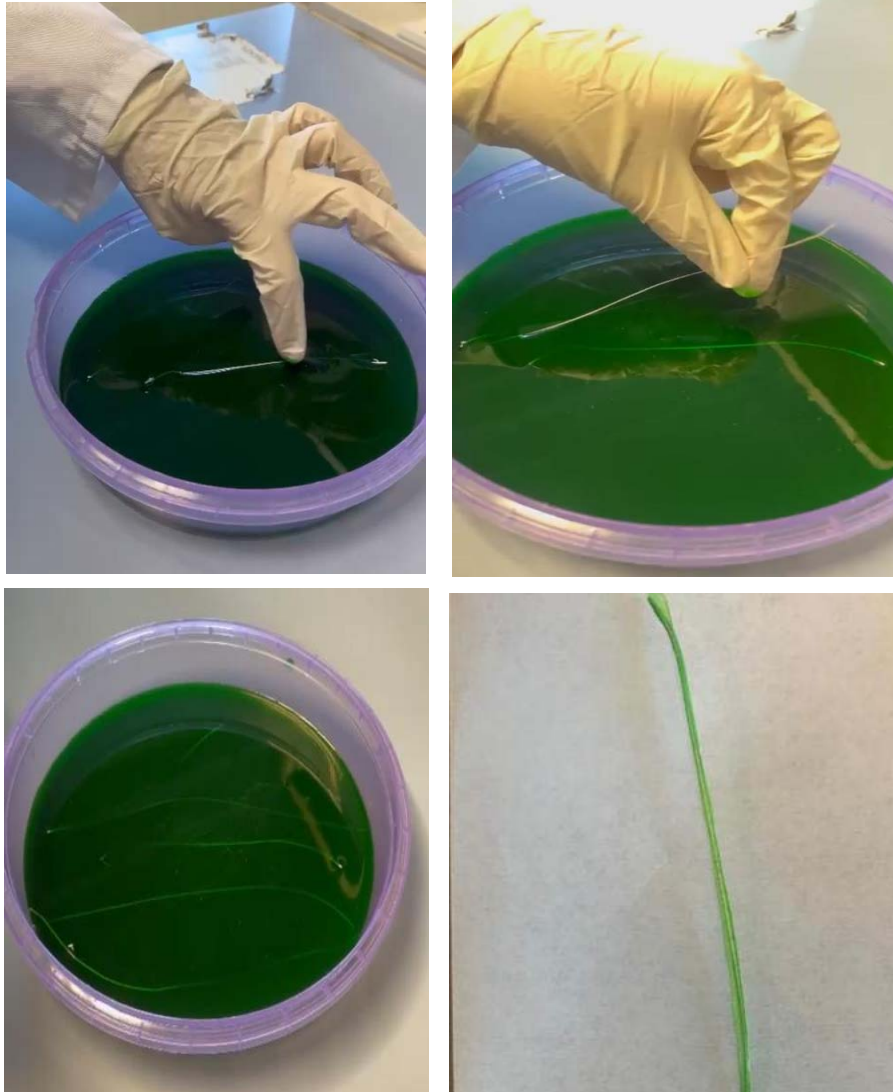

**Figure S2: Suture's Coating with using Chitosan Solution.**

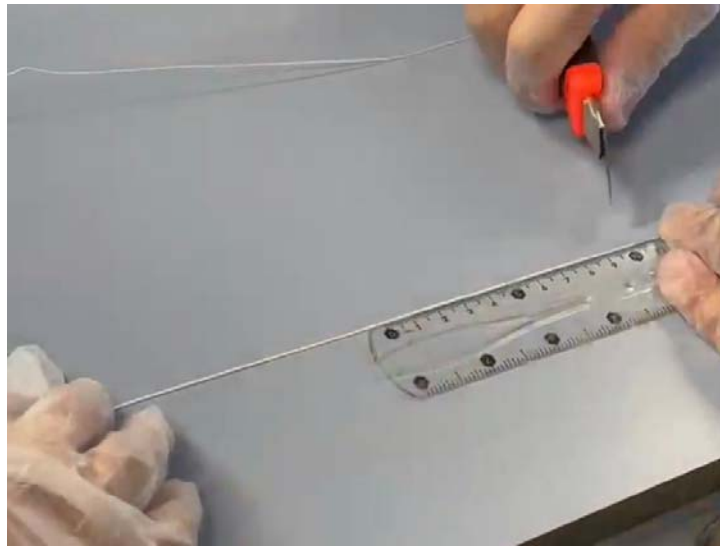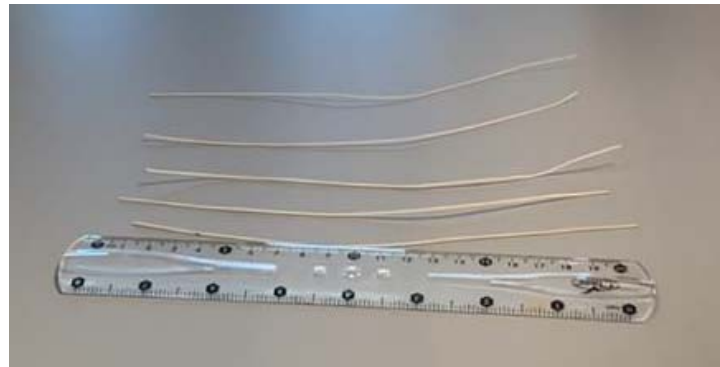

**Figure S3: Cutting the Sutures of Equal 20 cm Size Lengths.**

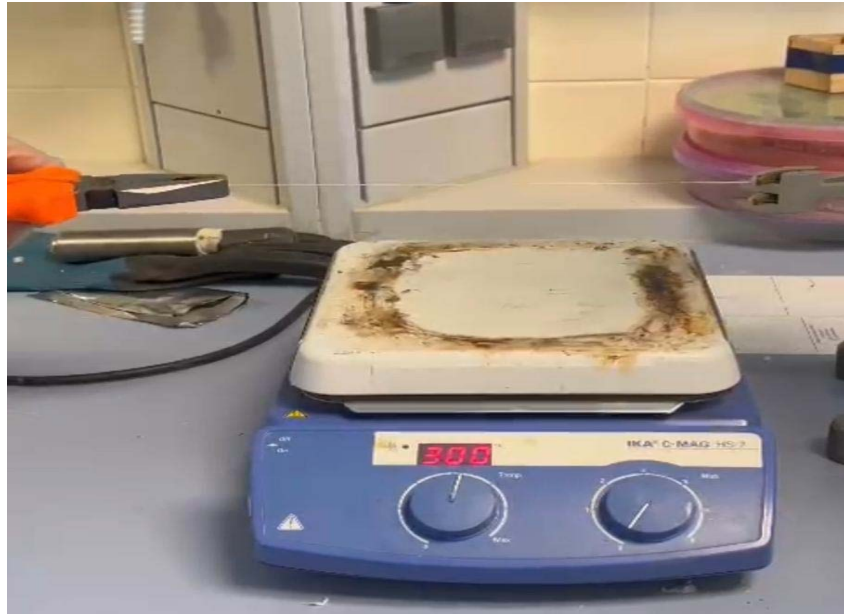

**Figure S4: Elongation of the Suture using heating hob.**

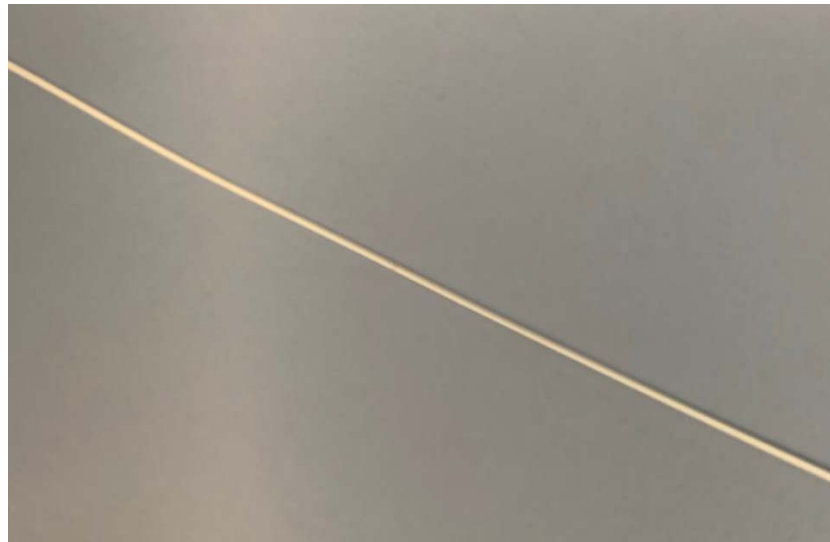

**Figure S5: Result Suture after stretching.**

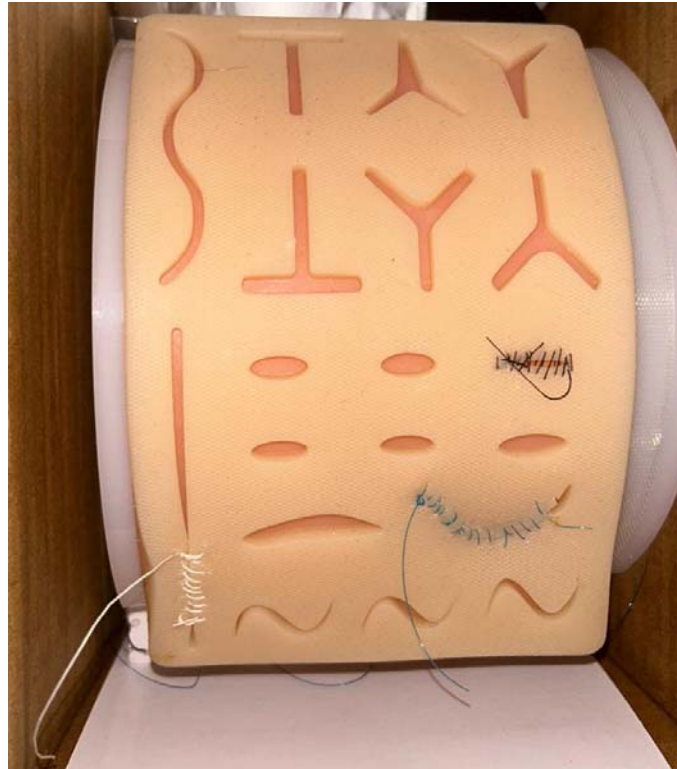

**Figure S6: Comparison of fabricated suture in this study with commercial sutures using Suturing Kit.**

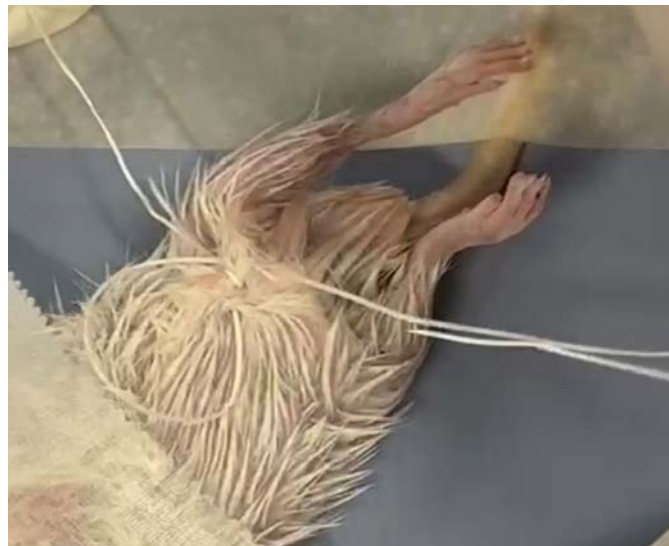

**Figure S7: Testing the sutures on a lab rat.**
